# Supplementary material for: Insecticide resistance status of malaria vectors in Lao PDR
Source: PubMed Central journal article supplement (PMC5402946; doi:10.1371/journal.pone.0175984), 2017-04-24
Supplement: pone.0175984.s001.pdf [file pone.0175984.s001.pdf]

|                    |            |                           |              |     |      |      |      |      |       |       |         |        |         |        |       |     |    |    |
|--------------------|------------|---------------------------|--------------|-----|------|------|------|------|-------|-------|---------|--------|---------|--------|-------|-----|----|----|
| Bokeo              | 2014 rainy | <i>An. umbrosus</i>       | DDT          |     | 74.2 | n/a  | n/a  |      | 244.0 | n/a   | n/a     |        | 3.2 +/- | 1.8018 | 0.869 | 16  | 15 |    |
| Phongsaly          | 2014 rainy | <i>An. maculatus s.l.</i> | permethrin   | n/a | n/a  | n/a  | n/a  | n/a  | n/a   | n/a   | n/a     | n/a    | n/a     | n/a    | n/a   | n/a | 17 | 17 |
| Phongsaly          | 2014 rainy | <i>An. maculatus s.l.</i> | deltamethrin | n/a | n/a  | n/a  | n/a  | n/a  | n/a   | n/a   | n/a     | n/a    | n/a     | n/a    | n/a   | n/a | 17 | 17 |
| Phongsaly          | 2014 rainy | <i>An. maculatus s.l.</i> | DDT          |     | 35.9 | 32.2 | 40.0 | 72.0 | 59.2  | 105.2 | 5.4 +/- | 0.9616 | 0.687   | 16     | 17    | 17  | 17 |    |
| Phongsaly          | 2014 rainy | <i>An. minimus s.l.</i>   | permethrin   |     | 14.2 | 12.2 | 16.6 | 31.8 | 24.1  | 64.5  | 4.7 +/- | 1.0979 | 0.892   | 15     | 10    | 10  | 10 |    |
| Phongsaly          | 2014 rainy | <i>An. minimus s.l.</i>   | deltamethrin | n/a | n/a  | n/a  | n/a  | n/a  | n/a   | n/a   | n/a     | n/a    | n/a     | n/a    | n/a   | n/a | 10 | 10 |
| Phongsaly          | 2014 rainy | <i>An. minimus s.l.</i>   | DDT          | n/a | n/a  | n/a  | n/a  | n/a  | n/a   | n/a   | n/a     | n/a    | n/a     | n/a    | n/a   | n/a | 10 | 10 |
| Luang Prabang      | 2014 rainy | <i>An. hyrcanus</i>       | permethrin   |     | 12.9 | 11.4 | 14.4 | 25.8 | 21.4  | 36.3  | 5.5 +/- | 0.9080 | 0.806   | 15     | 29    | 29  | 29 |    |
| Luang Prabang      | 2014 rainy | <i>An. hyrcanus</i>       | deltamethrin |     | 11.6 | 9.5  | 13.9 | 25.8 | 19.5  | 49.1  | 4.7 +/- | 1.0446 | 0.668   | 13     | 29    | 29  | 29 |    |
| Luang Prabang      | 2014 rainy | <i>An. hyrcanus</i>       | DDT          |     | 34.5 | n/a  | n/a  | 79.8 | n/a   | n/a   | 4.5 +/- | 1.9284 | 0.999   | 10     | 29    | 29  | 29 |    |
| Bolikhamxay        | 2014 rainy | <i>An. nivipes s.l.</i>   | permethrin   |     | 10.8 | 9.1  | 12.5 | 22.6 | 17.8  | 39.0  | 5.2 +/- | 1.1331 | 0.732   | 11     | 15    | 15  | 15 |    |
| Bolikhamxay        | 2014 rainy | <i>An. nivipes s.l.</i>   | deltamethrin |     |      |      |      |      |       |       |         |        |         |        |       |     | 15 | 15 |
| Bolikhamxay        | 2014 rainy | <i>An. nivipes s.l.</i>   | DDT          |     | 14.1 | 12.3 | 15.7 | 29.8 | 24.5  | 43.6  | 5.0 +/- | 0.8966 | 0.579   | 16     | 15    | 15  | 15 |    |
| Bolikhamxay        | 2014 rainy | <i>An. philippinensis</i> | permethrin   |     | 13.2 | 11.5 | 16.0 | 43.4 | 30.0  | 90.3  | 3.2 +/- | 0.5595 | 0.258   | 24     | 16    | 16  | 16 |    |
| Bolikhamxay        | 2014 rainy | <i>An. philippinensis</i> | deltamethrin |     |      |      |      |      |       |       |         |        |         |        |       |     | 16 | 16 |
| Bolikhamxay        | 2014 rainy | <i>An. philippinensis</i> | DDT          |     | 13.2 | 11.5 | 14.5 | 37.2 | 28.9  | 63.3  | 5.2 +/- | 0.9818 | 0.683   | 29     | 16    | 16  | 16 |    |
| Bolikhamxay        | 2014 rainy | <i>An. minimus s.l.</i>   | permethrin   |     | 10.4 | 9.2  | 11.7 | 29.2 | 23.4  | 42.0  | 3.7 +/- | 0.4889 | 0.818   | 25     | 16    | 16  | 16 |    |
| Bolikhamxay        | 2014 rainy | <i>An. minimus s.l.</i>   | deltamethrin | n/a | n/a  | n/a  | n/a  | n/a  | n/a   | n/a   | n/a     | n/a    | n/a     | n/a    | n/a   | n/a | 16 | 16 |
| Bolikhamxay        | 2014 rainy | <i>An. minimus s.l.</i>   | DDT          | n/a | n/a  | n/a  | n/a  | n/a  | n/a   | n/a   | n/a     | n/a    | n/a     | n/a    | n/a   | n/a | 16 | 16 |
| Vientiane province | 2014 rainy | <i>An. hyrcanus</i>       | permethrin   |     | 15.6 | 14.0 | 17.3 | 28.7 | 24.5  | 38.1  | 6.2 +/- | 1.0162 | 0.555   | 29     | 30    | 30  | 30 |    |
| Vientiane province | 2014 rainy | <i>An. hyrcanus</i>       | deltamethrin |     | 5.5  | 4.1  | 6.8  | 36.8 | 24.4  | 77.7  | 2.0 +/- | 0.3215 | 0.677   | 25     | 30    | 30  | 30 |    |
| Vientiane province | 2014 rainy | <i>An. hyrcanus</i>       | DDT          |     | 36.6 | 28.4 | 48.5 | 73.7 | 78.5  | 179.6 | 5.4 +/- | 0.6157 | 0.000   | 30     | 30    | 30  | 30 |    |
| Vientiane province | 2014 rainy | <i>An. nivipes s.l.</i>   | permethrin   |     | 13.0 | 11.2 | 14.7 | 22.9 | 18.9  | 37.1  | 6.7 +/- | 1.5750 | 0.373   | 25     | 30    | 30  | 30 |    |
| Vientiane province | 2014 rainy | <i>An. nivipes s.l.</i>   | deltamethrin |     | 3.8  | n/a  | n/a  | 8.1  | n/a   | n/a   | 5.1 +/- | 0.9939 | 0.051   | 25     | 30    | 30  | 30 |    |
| Vientiane province | 2014 rainy | <i>An. nivipes s.l.</i>   | DDT          |     | 19.7 | 15.4 | 23.9 | 38.4 | 33.2  | 61.0  | 5.7 +/- | 0.5945 | 0.040   | 38     | 30    | 30  | 30 |    |
| Vientiane province | 2014 rainy | <i>An. aconitus</i>       | permethrin   |     | 5.5  | 4.9  | 6.0  | 9.2  | 7.9   | 12.1  | 7.4 +/- | 1.3174 | 0.129   | 31     | 62    | 62  | 62 |    |
| Vientiane province | 2014 rainy | <i>An. aconitus</i>       | deltamethrin |     | 3.7  | 3.1  | 4.3  | 8.0  | 6.3   | 13.1  | 4.9 +/- | 0.9445 | 0.357   | 26     | 62    | 62  | 62 |    |
| Vientiane province | 2014 rainy | <i>An. aconitus</i>       | DDT          |     | 24.4 | 21.1 | 26.7 | 45.7 | 39.0  | 64.0  | 6.0 +/- | 1.1988 | 0.721   | 26     | 62    | 62  | 62 |    |
| Vientiane province | 2015 dry   | <i>An. minimus s.l.</i>   | permethrin   |     | 20.8 | 17.2 | 29.7 | 44.3 | 30.5  | 204.0 | 5.0 +/- | 1.5989 | 0.750   | 12     | 9     | 9   | 9  |    |
| Vientiane province | 2015 dry   | <i>An. minimus s.l.</i>   | deltamethrin | n/a | n/a  | n/a  | n/a  | n/a  | n/a   | n/a   | n/a     | n/a    | n/a     | n/a    | n/a   | n/a | 9  | 9  |
| Vientiane province | 2015 dry   | <i>An. minimus s.l.</i>   | DDT          |     | 24.7 | 19.4 | 45.9 | 79.9 | 44.0  | 686.3 | 3.2 +/- | 0.9505 | 0.103   | 17     | 9     | 9   | 9  |    |
| Vientiane province | 2015 dry   | <i>An. aconitus</i>       | permethrin   |     | 21.3 | 18.3 | 24.2 | 53.0 | 43.7  | 71.6  | 4.2 +/- | 0.5579 | 0.149   | 17     | 9     | 9   | 9  |    |
| Vientiane province | 2015 dry   | <i>An. aconitus</i>       | deltamethrin |     | n/a  | n/a  | n/a  | n/a  | n/a   | n/a   | n/a     | n/a    | n/a     | n/a    | n/a   | n/a | 9  | 9  |
| Vientiane province | 2015 dry   | <i>An. aconitus</i>       | DDT          |     | n/a  | n/a  | n/a  | n/a  | n/a   | n/a   | n/a     | n/a    | n/a     | n/a    | n/a   | n/a | 9  | 9  |
| Bokeo              | 2015 dry   | <i>An. minimus s.l.</i>   | permethrin   | n/a | n/a  | n/a  | n/a  | n/a  | n/a   | n/a   | n/a     | n/a    | n/a     | n/a    | n/a   | n/a | 15 | 15 |
| Bokeo              | 2015 dry   | <i>An. minimus s.l.</i>   | deltamethrin | n/a | n/a  | n/a  | n/a  | n/a  | n/a   | n/a   | n/a     | n/a    | n/a     | n/a    | n/a   | n/a | 15 | 15 |
| Bokeo              | 2015 dry   | <i>An. minimus s.l.</i>   | DDT          |     | 34.3 | 30.2 | 38.1 | 60.5 | 50.4  | 94.5  | 6.7 +/- | 1.5489 | 0.832   | 14     | 15    | 15  | 15 |    |
| Bokeo              | 2015 dry   | <i>An. umbrosus</i>       | permethrin   |     | 18.4 | 14.5 | 21.8 | 53.5 | 44.5  | 75.7  | 3.5 +/- | 0.3548 | 0.035   | 116    | 15    | 15  | 15 |    |
| Bokeo              | 2015 dry   | <i>An. umbrosus</i>       | deltamethrin | n/a | n/a  | n/a  | n/a  | n/a  | n/a   | n/a   | n/a     | n/a    | n/a     | n/a    | n/a   | n/a | 15 | 15 |
| Bokeo              | 2015 dry   | <i>An. umbrosus</i>       | DDT          | n/a | n/a  | n/a  | n/a  | n/a  | n/a   | n/a   | n/a     | n/a    | n/a     | n/a    | n/a   | n/a | 15 | 15 |
| Khammouane         | 2015 dry   | <i>An. vagus</i>          | permethrin   |     | 19.5 | 17.6 | 21.1 | 31.2 | 27.6  | 39.2  | 8.0 +/- | 1.3926 | 0.799   | 26     | 18    | 18  | 18 |    |
| Khammouane         | 2015 dry   | <i>An. vagus</i>          | deltamethrin | n/a | n/a  | n/a  | n/a  | n/a  | n/a   | n/a   | n/a     | n/a    | n/a     | n/a    | n/a   | n/a | 18 | 18 |
| Khammouane         | 2015 dry   | <i>An. vagus</i>          | DDT          |     | 43.5 | 38.6 | 48.7 | 91.2 | 71.2  | 175.2 | 5.1 +/- | 1.2175 | 0.998   | 18     | 18    | 18  | 18 |    |
| Phongsaly          | 2015 dry   | <i>An. minimus s.l.</i>   | permethrin   |     | 20.2 | 14.8 | 25.8 | 87.0 | 56.8  | 223.0 | 2.6 +/- | 0.5418 | 0.188   | 10     | 13    | 13  | 13 |    |
| Phongsaly          | 2015 dry   | <i>An. minimus s.l.</i>   | deltamethrin | n/a | n/a  | n/a  | n/a  | n/a  | n/a   | n/a   | n/a     | n/a    | n/a     | n/a    | n/a   | n/a | 13 | 13 |
| Phongsaly          | 2015 dry   | <i>An. minimus s.l.</i>   | DDT          |     | 12.8 | 8.8  | 16.3 | 51.6 | 36.6  | 101.4 | 2.7 +/- | 0.5215 | 0.989   | 12     | 13    | 13  | 13 |    |

|                    |            |                           |              |                |                |                |                |                |                |                |                |                |                |    |
|--------------------|------------|---------------------------|--------------|----------------|----------------|----------------|----------------|----------------|----------------|----------------|----------------|----------------|----------------|----|
| Phongsaly          | 2015 dry   | <i>An. maculatus s.l.</i> | permethrin   | 43.5           | 36.5           | 56.5           | 128.9          | 85.1           | 366.6          | 3.5 +/-        | 0.8000         | 0.306          | 17             | 15 |
| Phongsaly          | 2015 dry   | <i>An. maculatus s.l.</i> | deltamethrin | 14.6           | 11.3           | 17.5           | 27.3           | 21.5           | 55.1           | 6.1 +/-        | 1.6992         | 0.469          | 10             | 15 |
| Phongsaly          | 2015 dry   | <i>An. maculatus s.l.</i> | DDT          | 23.4           | 20.5           | 26.9           | 46.5           | 37.2           | 74.2           | 5.5 +/-        | 1.0961         | 0.435          | 15             | 15 |
| Luang Prabang      | 2015 dry   | <i>An. maculatus s.l.</i> | permethrin   | 28.3           | 25.9           | 30.6           | 65.5           | 57.2           | 79.0           | 4.5 +/-        | 0.4326         | 0.552          | 35             | 39 |
| Luang Prabang      | 2015 dry   | <i>An. maculatus s.l.</i> | deltamethrin | 12.4           | 9.9            | 15.4           | 30.8           | 22.2           | 69.9           | 4.1 +/-        | 0.9738         | 0.055          | 16             | 39 |
| Luang Prabang      | 2015 dry   | <i>An. maculatus s.l.</i> | DDT          | 45.5           | 39.2           | 57.6           | 137.1          | 113.5          | 303.9          | 3.4 +/-        | 0.4305         | 0.019          | 39             | 39 |
| Luang Prabang      | 2015 dry   | <i>An. minimus s.l.</i>   | permethrin   | 14.0           | 11.2           | 16.8           | 32.4           | 24.5           | 60.6           | 4.5 +/-        | 0.9823         | 0.168          | 13             | 41 |
| Luang Prabang      | 2015 dry   | <i>An. minimus s.l.</i>   | deltamethrin | n/a            | n/a            | n/a            | n/a            | n/a            | n/a            | n/a            | n/a            | n/a            | n/a            | 41 |
| Luang Prabang      | 2015 dry   | <i>An. minimus s.l.</i>   | DDT          | 31.2           | 26.8           | 37.5           | 73.1           | 54.2           | 144.6          | 4.5 +/-        | 0.9419         | 0.288          | 12             | 41 |
| Luang Prabang      | 2015 dry   | <i>An. vagus</i>          | permethrin   | 16.1           | 14.6           | 17.6           | 35.4           | 31.7           | 40.8           | 4.8 +/-        | 0.4224         | 0.270          | 47             | 49 |
| Luang Prabang      | 2015 dry   | <i>An. vagus</i>          | deltamethrin | 8.4            | 6.6            | 9.9            | 20.9           | 17.1           | 29.1           | 4.1 +/-        | 0.6451         | 0.263          | 21             | 49 |
| Luang Prabang      | 2015 dry   | <i>An. vagus</i>          | DDT          | 104.2          | 75.7           | 368.0          | 339.8          | 159.4          | 7470.5         | 3.2 +/-        | 0.9949         | 0.939          | 46             | 49 |
| Phongsaly          | 2015 rainy | <i>An. maculatus s.l.</i> | permethrin   | 22.0           | 17.9           | 26.4           | 100.8          | 69.8           | 196.1          | 2.5 +/-        | 0.3914         | 0.168          | 19             | 15 |
| Phongsaly          | 2015 rainy | <i>An. maculatus s.l.</i> | deltamethrin | n/a            | n/a            | n/a            | n/a            | n/a            | n/a            | n/a            | n/a            | n/a            | n/a            | 15 |
| Phongsaly          | 2015 rainy | <i>An. maculatus s.l.</i> | DDT          | 46.0           | 33.9           | 79.6           | 688.7          | 245.9          | 10975.6        | 1.4 +/-        | 0.3320         | 0.985          | 17             | 15 |
| Phongsaly          | 2015 rainy | <i>An. kochi</i>          | permethrin   | 26.1           | 21.6           | 30.3           | 65.1           | 51.6           | 99.3           | 4.1 +/-        | 0.7032         | 0.690          | 11             | 15 |
| Phongsaly          | 2015 rainy | <i>An. kochi</i>          | deltamethrin | n/a            | n/a            | n/a            | n/a            | n/a            | n/a            | n/a            | n/a            | n/a            | n/a            | 15 |
| Phongsaly          | 2015 rainy | <i>An. kochi</i>          | DDT          | 0 after 60 min | 0 after 60 min | 0 after 60 min | 0 after 60 min | 0 after 60 min | 0 after 60 min | 0 after 60 min | 0 after 60 min | 0 after 60 min | 0 after 60 min | 15 |
| Bokeo              | 2015 rainy | <i>An. vagus</i>          | permethrin   | 15.7           | 14.2           | 17.0           | 33.9           | 31.2           | 38.1           | 4.9 +/-        | 0.2226         | 0.003          | 144            | 70 |
| Bokeo              | 2015 rainy | <i>An. vagus</i>          | deltamethrin | 24.7           | 23.5           | 25.8           | 65.6           | 60.6           | 72.0           | 3.9 +/-        | 0.1845         | 0.415          | 136            | 70 |
| Bokeo              | 2015 rainy | <i>An. vagus</i>          | DDT          | 56.9           | 54.4           | 60.2           | 118.4          | 104.6          | 139.4          | 5.2 +/-        | 0.3660         | 0.942          | 148            | 70 |
| Vientiane province | 2015 rainy | <i>An. nivipes s.l.</i>   | permethrin   | 23.3           | 20.1           | 26.2           | 56.0           | 47.3           | 72.3           | 4.3 +/-        | 0.5445         | 0.288          | 17             | 15 |
| Vientiane province | 2015 rainy | <i>An. nivipes s.l.</i>   | deltamethrin | 15.2           | n/a            | n/a            | 38.5           | n/a            | n/a            | 4.1 +/-        | 1.5323         | 0.043          | 16             | 15 |
| Vientiane province | 2015 rainy | <i>An. nivipes s.l.</i>   | DDT          | 48.9           | 44.6           | 57.1           | 90.2           | 70.9           | 168.3          | 6.2 +/-        | 1.4385         | 0.053          | 20             | 15 |
| Vientiane province | 2015 rainy | <i>An. aconitus</i>       | permethrin   | 16.2           | 13.7           | 17.8           | 23.0           | 20.4           | 32.4           | 10.7 +/-       | 2.9434         | 0.104          | 16             | 15 |
| Vientiane province | 2015 rainy | <i>An. aconitus</i>       | deltamethrin | n/a            | n/a            | n/a            | n/a            | n/a            | n/a            | n/a            | n/a            | n/a            | n/a            | 15 |
| Vientiane province | 2015 rainy | <i>An. aconitus</i>       | DDT          | 22.3           | 18.9           | 25.5           | 69.2           | 55.8           | 95.9           | 3.3 +/-        | 0.4134         | 0.486          | 19             | 15 |
| Vientiane province | 2015 rainy | <i>An. tessellatus</i>    | permethrin   | 22.3           | 18.0           | 27.8           | 50.4           | 36.6           | 127.0          | 4.6 +/-        | 1.2330         | 0.653          | 9              | 15 |
| Vientiane province | 2015 rainy | <i>An. tessellatus</i>    | deltamethrin | n/a            | n/a            | n/a            | n/a            | n/a            | n/a            | n/a            | n/a            | n/a            | n/a            | 15 |
| Vientiane province | 2015 rainy | <i>An. tessellatus</i>    | DDT          | n/a            | n/a            | n/a            | n/a            | n/a            | n/a            | n/a            | n/a            | n/a            | n/a            | 15 |
| Attapeu            | 2015 rainy | <i>An. nivipes s.l.</i>   | permethrin   | 14.7           | 12.0           | 17.4           | 45.9           | 35.7           | 70.2           | 3.3 +/-        | 0.5038         | 0.874          | 20             | 20 |
| Attapeu            | 2015 rainy | <i>An. nivipes s.l.</i>   | deltamethrin | 22.3           | 19.1           | 25.2           | 61.6           | 51.2           | 81.2           | 3.7 +/-        | 0.4566         | 0.723          | 21             | 20 |
| Attapeu            | 2015 rainy | <i>An. nivipes s.l.</i>   | DDT          | 87.6           | n/a            | n/a            | 210.4          | n/a            | n/a            | 4.3 +/-        | 2.6144         | 0.854          | 20             | 20 |
| Attapeu            | 2015 rainy | <i>An. vagus</i>          | permethrin   | 15.7           | 12.8           | 18.4           | 50.1           | 40.5           | 68.9           | 3.3 +/-        | 0.4114         | 0.979          | 19             | 14 |
| Attapeu            | 2015 rainy | <i>An. vagus</i>          | deltamethrin | n/a            | n/a            | n/a            | n/a            | n/a            | n/a            | n/a            | n/a            | n/a            | n/a            | 14 |
| Attapeu            | 2015 rainy | <i>An. vagus</i>          | DDT          | 2070.5         | n/a            | n/a            | 4475638.2      | n/a            | n/a            | 0.5 +/-        | 0.3733         | 1.000          | 15             | 14 |
| Attapeu            | 2015 rainy | <i>An. kochi</i>          | permethrin   | 25.1           | 21.8           | 28.0           | 52.8           | 44.9           | 69.1           | 5.1 +/-        | 0.7585         | 0.962          | 17             | 15 |
| Attapeu            | 2015 rainy | <i>An. kochi</i>          | deltamethrin | n/a            | n/a            | n/a            | n/a            | n/a            | n/a            | n/a            | n/a            | n/a            | n/a            | 15 |
| Attapeu            | 2015 rainy | <i>An. kochi</i>          | DDT          | 76.8           | n/a            | n/a            | 173.7          | n/a            | n/a            | 4.6 +/-        | 2.2149         | 0.970          | 14             | 15 |
| Sekong             | 2015 rainy | <i>An. kochi</i>          | permethrin   | n/a            | n/a            | n/a            | n/a            | n/a            | n/a            | n/a            | n/a            | n/a            | n/a            | 25 |
| Sekong             | 2015 rainy | <i>An. kochi</i>          | deltamethrin | n/a            | n/a            | n/a            | n/a            | n/a            | n/a            | n/a            | n/a            | n/a            | n/a            | 25 |
| Sekong             | 2015 rainy | <i>An. kochi</i>          | DDT          | 27.7           | 24.8           | 30.6           | 65.4           | 55.2           | 84.1           | 4.4 +/-        | 0.5120         | 0.525          | 23             | 25 |
| Sekong             | 2015 rainy | <i>An. nivipes s.l.</i>   | permethrin   | 18.4           | 16.7           | 20.1           | 41.5           | 37.1           | 48.0           | 4.7 +/-        | 0.4036         | 0.744          | 50             | 50 |
| Sekong             | 2015 rainy | <i>An. nivipes s.l.</i>   | deltamethrin | 12.1           | 10.5           | 13.5           | 27.3           | 24.1           | 32.3           | 4.7 +/-        | 0.5319         | 0.723          | 49             | 50 |
| Sekong             | 2015 rainy | <i>An. nivipes s.l.</i>   | DDT          | 36.0           | 34.4           | 37.8           | 77.0           | 69.9           | 87.1           | 5.0 +/-        | 0.3375         | 0.533          | 77             | 50 |
| Luang Prabang      | 2015 rainy | <i>An. nivipes s.l.</i>   | permethrin   | 19.6           | 17.7           | 21.4           | 54.5           | 48.1           | 63.8           | 3.7 +/-        | 0.2834         | 0.329          | 46             | 50 |

|               |            |                         |              |      |     |      |      |       |      |       |  |                |       |     |    |
|---------------|------------|-------------------------|--------------|------|-----|------|------|-------|------|-------|--|----------------|-------|-----|----|
| Luang Prabang | 2015 rainy | <i>An. nivipes s.l.</i> | deltamethrin | 19.5 | n/a | n/a  |      | 106.3 | n/a  | n/a   |  | 2.2 +/- 0.8536 | 0.504 | 28  | 50 |
| Luang Prabang | 2015 rainy | <i>An. nivipes s.l.</i> | DDT          | 23.4 |     | 17.6 | 28.4 | 68.8  | 57.4 | 111.2 |  | 3.5 +/- 0.3541 | 0.019 | 44  | 50 |
| Luang Prabang | 2015 rainy | <i>An. minimus s.l.</i> | permethrin   | 11.4 |     | 9.7  | 13.0 | 33.6  | 28.3 | 42.8  |  | 3.5 +/- 0.3737 | 0.503 | 37  | 50 |
| Luang Prabang | 2015 rainy | <i>An. minimus s.l.</i> | deltamethrin | n/a  | n/a | n/a  | n/a  | n/a   | n/a  | n/a   |  | n/a            | n/a   | n/a | 50 |
| Luang Prabang | 2015 rainy | <i>An. minimus s.l.</i> | DDT          | 26.6 |     | 24.8 | 28.2 | 47.5  | 43.3 | 53.8  |  | 6.5 +/- 0.6089 | 0.236 | 41  | 50 |
